# Supplementary material for: The role of the donor group and electron-accepting substitutions inserted in π-linkers in tuning the optoelectronic properties of D–π–A dye-sensitized solar cells: a DFT/TDDFT study
Source: Royal Society of Chemistry journal article supplement (doi:10.1039/d2ra00906d), 2022-01-01

## Supplementary data file

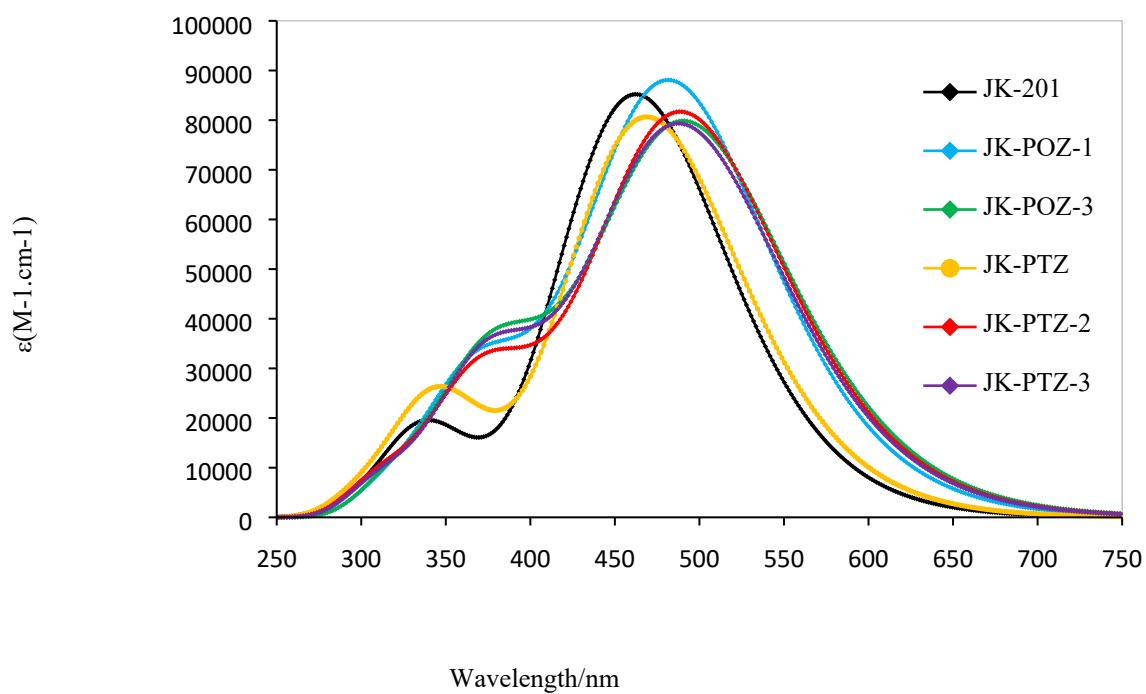

**Fig. S1.** Calculated absorption spectra of the reference and JK-POZ-1, JK-POZ-3, JK-PTZ, JK-PTZ-2 and JK-PTZ-3 designed dyes at PCM/LC-wPBE/6-31++G(d,p) level of theory in THF solvent.

The coordinate files for the molecular structures

| center<br>Number | Atomic<br>Number | Coordinates (Angstroms) |          |         | center<br>Number | Atomic<br>Number | Coordinates (Angstroms) |          |          |
|------------------|------------------|-------------------------|----------|---------|------------------|------------------|-------------------------|----------|----------|
|                  |                  | X                       | Y        | Z       |                  |                  | X                       | Y        | Z        |
| 1                | 6                | 1.886998                | -1.24345 | -0.7451 | 81               | 1                | -7.85842                | 6.657864 | 1.149624 |
| 2                | 6                | 2.498433                | -2.30476 | -1.3895 | 82               | 1                | -6.42853                | 8.113517 | -2.6422  |
| 3                | 6                | 3.921289                | -2.28118 | -1.3361 | 83               | 1                | -7.77801                | 8.427883 | -0.58843 |
| 4                | 6                | 4.444023                | -1.19158 | -0.6572 | 84               | 6                | -5.81397                | 4.485751 | 2.341403 |
| 5                | 6                | 2.64249                 | -4.03335 | -2.9591 | 85               | 6                | -7.81326                | 3.445102 | 1.189572 |
| 6                | 6                | 3.959426                | -4.41608 | -2.3072 | 86               | 6                | -9.05451                | -1.31265 | -0.19308 |
| 7                | 1                | 2.072486                | -4.92162 | -3.2396 | 87               | 6                | -8.00943                | -3.0271  | -1.73413 |
| 8                | 1                | 4.602149                | -4.95969 | -3.0025 | 88               | 1                | -7.32337                | -3.87535 | -1.81744 |
| 9                | 6                | 5.824092                | -0.86697 | -0.4265 | 89               | 1                | -8.99852                | -3.35179 | -2.07472 |
| 10               | 6                | 6.943721                | -1.54576 | -0.8961 | 90               | 1                | -7.66323                | -2.23698 | -2.40925 |
| 11               | 6                | 7.964229                | 0.205546 | 0.33357 | 91               | 1                | -8.72159                | -0.49547 | -0.842   |
| 12               | 6                | 8.141793                | -0.93856 | -0.4644 | 92               | 1                | -10.0583                | -1.61101 | -0.51415 |
| 13               | 1                | 6.872824                | -2.42667 | -1.5174 | 93               | 1                | -9.12217                | -0.93267 | 0.830697 |
| 14               | 6                | 9.150369                | 0.814997 | 0.76225 | 94               | 1                | -7.71175                | 2.534628 | 1.789976 |
| 15               | 6                | 10.28133                | 0.139089 | 0.2940  | 95               | 1                | -8.49188                | 4.123557 | 1.717683 |
| 16               | 1                | 9.205107                | 1.701138 | 1.38069 | 96               | 1                | -8.27362                | 3.177016 | 0.233872 |
| 17               | 6                | 11.66808                | 0.393641 | 0.47664 | 97               | 1                | -4.83681                | 4.960805 | 2.212885 |
| 18               | 6                | 12.30066                | 1.393953 | 1.17848 | 98               | 1                | -6.46416                | 5.18103  | 2.883167 |
| 19               | 6                | 13.78173                | 1.394614 | 1.18409 | 99               | 1                | -5.6834                 | 3.593029 | 2.962604 |
| 20               | 6                | 11.6031                 | 2.412182 | 1.88837 |                  |                  |                         |          |          |
| 21               | 8                | 14.48211                | 0.575913 | 0.61393 |                  |                  |                         |          |          |
| 22               | 8                | 14.29804                | 2.419686 | 1.90289 |                  |                  |                         |          |          |
| 23               | 1                | 15.26502                | 2.341238 | 1.85143 |                  |                  |                         |          |          |
| 24               | 1                | 12.35742                | -0.29769 | -0.0046 |                  |                  |                         |          |          |
| 25               | 16               | 9.826426                | -1.27327 | -0.6933 |                  |                  |                         |          |          |
| 26               | 16               | 6.264925                | 0.539658 | 0.56257 |                  |                  |                         |          |          |
| 27               | 16               | 3.122663                | -0.19863 | -0.0585 |                  |                  |                         |          |          |
| 28               | 7                | 10.996                  | 3.228869 | 2.45756 |                  |                  |                         |          |          |
| 29               | 8                | 1.819179                | -3.30802 | -2.0335 |                  |                  |                         |          |          |
| 30               | 8                | 4.69453                 | -3.23824 | -1.9278 |                  |                  |                         |          |          |
| 31               | 1                | 2.819558                | -3.4182  | -3.8511 |                  |                  |                         |          |          |
| 32               | 1                | 3.782323                | -5.03206 | -1.4166 |                  |                  |                         |          |          |
| 33               | 6                | 0.469892                | -0.9309  | -0.5896 |                  |                  |                         |          |          |
| 34               | 6                | 0.043183                | 0.353901 | -0.1908 |                  |                  |                         |          |          |
| 35               | 6                | -0.53248                | -1.89884 | -0.8188 |                  |                  |                         |          |          |
| 36               | 6                | -1.30054                | 0.65745  | -0.0197 |                  |                  |                         |          |          |
| 37               | 1                | 0.774457                | 1.136023 | -0.0077 |                  |                  |                         |          |          |
| 38               | 6                | -1.87967                | -1.59524 | -0.6624 |                  |                  |                         |          |          |
| 39               | 1                | -0.25203                | -2.89694 | -1.1304 |                  |                  |                         |          |          |
| 40               | 6                | -2.29346                | -0.31286 | -0.2562 |                  |                  |                         |          |          |
| 41               | 1                | -1.58807                | 1.654366 | 0.29578 |                  |                  |                         |          |          |
| 42               | 1                | -2.62332                | -2.36121 | -0.8541 |                  |                  |                         |          |          |
| 43               | 7                | -3.66173                | -0.00713 | -0.0898 |                  |                  |                         |          |          |
| 44               | 6                | -4.56917                | -0.99403 | 0.3941  |                  |                  |                         |          |          |
| 45               | 6                | -4.23363                | -1.77967 | 1.51201 |                  |                  |                         |          |          |
| 46               | 6                | -5.8122                 | -1.17923 | -0.2401 |                  |                  |                         |          |          |
| 47               | 6                | -5.11263                | -2.75075 | 1.99186 |                  |                  |                         |          |          |
| 48               | 1                | -3.27753                | -1.62293 | 2.00078 |                  |                  |                         |          |          |
| 49               | 6                | -6.6923                 | -2.13619 | 0.24840 |                  |                  |                         |          |          |
| 50               | 1                | -6.06352                | -0.56963 | -1.1031 |                  |                  |                         |          |          |
| 51               | 6                | -6.34778                | -2.9297  | 1.36162 |                  |                  |                         |          |          |
| 52               | 1                | -4.83461                | -3.34627 | 2.8570  |                  |                  |                         |          |          |
| 53               | 6                | -8.07907                | -2.50922 | -0.2787 |                  |                  |                         |          |          |
| 54               | 6                | -7.45469                | -3.85195 | 1.63971 |                  |                  |                         |          |          |
| 55               | 6                | -8.47427                | -3.62303 | 0.69219 |                  |                  |                         |          |          |
| 56               | 6                | -7.60688                | -4.83109 | 2.62618 |                  |                  |                         |          |          |
| 57               | 6                | -9.64626                | -4.37234 | 0.72909 |                  |                  |                         |          |          |
| 58               | 6                | -8.78734                | -5.57974 | 2.65862 |                  |                  |                         |          |          |
| 59               | 1                | -6.82443                | -5.01193 | 3.35816 |                  |                  |                         |          |          |
| 60               | 6                | -9.80027                | -5.35362 | 1.71838 |                  |                  |                         |          |          |
| 61               | 1                | -10.4393                | -4.2057  | 0.00436 |                  |                  |                         |          |          |
| 62               | 1                | -8.92018                | -6.34346 | 3.41955 |                  |                  |                         |          |          |
| 63               | 1                | -10.712                 | -5.94283 | 1.75606 |                  |                  |                         |          |          |
| 64               | 6                | -4.15516                | 1.292607 | -0.4059 |                  |                  |                         |          |          |
| 65               | 6                | -3.79168                | 1.915297 | -1.6139 |                  |                  |                         |          |          |
| 66               | 6                | -5.01783                | 1.954596 | 0.48792 |                  |                  |                         |          |          |
| 67               | 6                | -4.26603                | 3.188174 | -1.9317 |                  |                  |                         |          |          |
| 68               | 1                | -3.13341                | 1.393235 | -2.3008 |                  |                  |                         |          |          |
| 69               | 6                | -5.50119                | 3.21538  | 0.16279 |                  |                  |                         |          |          |
| 70               | 1                | -5.29168                | 1.468022 | 1.41948 |                  |                  |                         |          |          |
| 71               | 6                | -5.12635                | 3.840942 | -1.0438 |                  |                  |                         |          |          |
| 72               | 1                | -3.97345                | 3.651737 | -2.8698 |                  |                  |                         |          |          |
| 73               | 6                | -6.43559                | 4.113529 | 0.97526 |                  |                  |                         |          |          |
| 74               | 6                | -5.77442                | 5.155797 | -1.1104 |                  |                  |                         |          |          |
| 75               | 6                | -6.54241                | 5.33376  | 0.05927 |                  |                  |                         |          |          |
| 76               | 6                | -5.72737                | 6.152864 | -2.0894 |                  |                  |                         |          |          |
| 77               | 6                | -7.26355                | 6.508162 | 0.25205 |                  |                  |                         |          |          |
| 78               | 6                | -6.45527                | 7.329913 | -1.8904 |                  |                  |                         |          |          |
| 79               | 1                | -5.13621                | 6.02146  | -2.9916 |                  |                  |                         |          |          |
| 80               | 6                | -7.21801                | 7.507972 | -0.7295 |                  |                  |                         |          |          |

**JK-201**

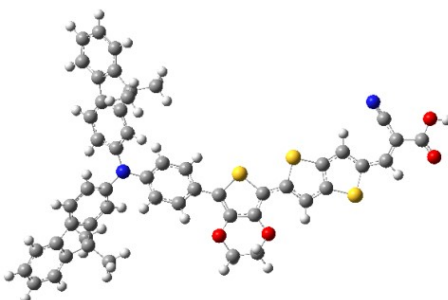

| center<br>Number | Atomic<br>Number | Coordinates (Angstroms) |          |          | Number | Number | X        | Y        | Z        |
|------------------|------------------|-------------------------|----------|----------|--------|--------|----------|----------|----------|
|                  |                  | X                       | Y        | Z        | 82     | 7      | -4.47109 | 5.044028 | 0.405191 |
| 1                | 6                | -0.36914                | -1.44105 | -0.32867 |        |        |          |          |          |
| 2                | 6                | -1.48093                | -2.23986 | -0.45742 |        |        |          |          |          |
| 3                | 6                | -2.62692                | -1.39512 | -0.32357 |        |        |          |          |          |
| 4                | 1                | -1.47837                | -3.31102 | -0.58933 |        |        |          |          |          |
| 5                | 6                | -2.1412                 | -0.10863 | -0.13844 |        |        |          |          |          |
| 6                | 6                | 1.037866                | -1.69736 | -0.35012 |        |        |          |          |          |
| 7                | 6                | 1.679881                | -2.90575 | -0.55604 |        |        |          |          |          |
| 8                | 6                | 3.095235                | -2.8157  | -0.5078  |        |        |          |          |          |
| 9                | 6                | 3.572525                | -1.53138 | -0.28014 |        |        |          |          |          |
| 10               | 6                | 1.875283                | -5.10775 | -1.30321 |        |        |          |          |          |
| 11               | 6                | 3.192963                | -5.15286 | -0.54708 |        |        |          |          |          |
| 12               | 1                | 1.330711                | -6.04787 | -1.19288 |        |        |          |          |          |
| 13               | 1                | 3.854439                | -5.91871 | -0.95723 |        |        |          |          |          |
| 14               | 6                | 4.937512                | -1.1006  | -0.17608 |        |        |          |          |          |
| 15               | 6                | 6.083366                | -1.86143 | -0.38746 |        |        |          |          |          |
| 16               | 6                | 7.03517                 | 0.237925 | 0.166792 |        |        |          |          |          |
| 17               | 6                | 7.25678                 | -1.10383 | -0.19208 |        |        |          |          |          |
| 18               | 1                | 6.046814                | -2.90326 | -0.67135 |        |        |          |          |          |
| 19               | 6                | 8.196723                | 0.99676  | 0.35718  |        |        |          |          |          |
| 20               | 6                | 9.353499                | 0.240019 | 0.144937 |        |        |          |          |          |
| 21               | 1                | 8.217147                | 2.042373 | 0.634619 |        |        |          |          |          |
| 22               | 6                | 10.72919                | 0.588589 | 0.224911 |        |        |          |          |          |
| 23               | 6                | 11.32241                | 1.789494 | 0.54111  |        |        |          |          |          |
| 24               | 6                | 12.80234                | 1.842452 | 0.540989 |        |        |          |          |          |
| 25               | 6                | 10.58548                | 2.964311 | 0.86342  |        |        |          |          |          |
| 26               | 8                | 13.53437                | 0.902742 | 0.281956 |        |        |          |          |          |
| 27               | 8                | 13.27855                | 3.068223 | 0.865101 |        |        |          |          |          |
| 28               | 1                | 14.24796                | 3.009587 | 0.840041 |        |        |          |          |          |
| 29               | 1                | 11.44517                | -0.20154 | 0.006183 |        |        |          |          |          |
| 30               | 16               | 8.953535                | -1.43959 | -0.29777 |        |        |          |          |          |
| 31               | 16               | 5.323896                | 0.572822 | 0.27424  |        |        |          |          |          |
| 32               | 16               | 2.21443                 | -0.42076 | -0.11538 |        |        |          |          |          |
| 33               | 7                | 9.946574                | 3.904828 | 1.121952 |        |        |          |          |          |
| 34               | 8                | 1.019288                | -4.08553 | -0.76677 |        |        |          |          |          |
| 35               | 8                | 3.899591                | -3.90539 | -0.68222 |        |        |          |          |          |
| 36               | 1                | 2.051406                | -4.91159 | -2.36884 |        |        |          |          |          |
| 37               | 1                | 3.018709                | -5.35311 | 0.517534 |        |        |          |          |          |
| 38               | 8                | -0.76581                | -0.14449 | -0.13249 |        |        |          |          |          |
| 39               | 6                | -4.02399                | -1.87656 | -0.334   |        |        |          |          |          |
| 40               | 6                | -4.92631                | -1.52067 | 0.687412 |        |        |          |          |          |
| 41               | 6                | -4.47003                | -2.74619 | -1.33897 |        |        |          |          |          |
| 42               | 6                | -6.21958                | -2.01757 | 0.691162 |        |        |          |          |          |
| 43               | 1                | -4.6226                 | -0.86443 | 1.495859 |        |        |          |          |          |
| 44               | 6                | -5.7779                 | -3.23891 | -1.33588 |        |        |          |          |          |
| 45               | 1                | -3.79691                | -3.02921 | -2.14226 |        |        |          |          |          |
| 46               | 6                | -6.66901                | -2.88529 | -0.32048 |        |        |          |          |          |
| 47               | 1                | -6.10876                | -3.90758 | -2.12661 |        |        |          |          |          |
| 48               | 6                | -8.4063                 | -1.88384 | 1.597127 |        |        |          |          |          |
| 49               | 6                | -8.89703                | -2.74381 | 0.600128 |        |        |          |          |          |
| 50               | 1                | -8.3446                 | -3.8334  | -1.06812 |        |        |          |          |          |
| 51               | 6                | -9.26842                | -1.24936 | 2.480644 |        |        |          |          |          |
| 52               | 6                | -10.2755                | -2.9525  | 0.508825 |        |        |          |          |          |
| 53               | 1                | -8.8483                 | -0.59034 | 3.233339 |        |        |          |          |          |
| 54               | 6                | -10.6481                | -1.47295 | 2.389726 |        |        |          |          |          |
| 55               | 6                | -11.1481                | -2.32346 | 1.403607 |        |        |          |          |          |
| 56               | 1                | -10.6627                | -3.61739 | -0.2594  |        |        |          |          |          |
| 57               | 1                | -11.3198                | -0.98121 | 3.085742 |        |        |          |          |          |
| 58               | 1                | -12.2157                | -2.50189 | 1.322376 |        |        |          |          |          |
| 59               | 6                | -2.73517                | 1.213919 | 0.00671  |        |        |          |          |          |
| 60               | 6                | -2.01082                | 2.25919  | 0.60654  |        |        |          |          |          |
| 61               | 6                | -4.03126                | 1.491678 | -0.47985 |        |        |          |          |          |
| 62               | 6                | -2.56509                | 3.532114 | 0.73141  |        |        |          |          |          |
| 63               | 1                | -1.01009                | 2.074715 | 0.979393 |        |        |          |          |          |
| 64               | 6                | -4.57697                | 2.754887 | -0.34065 |        |        |          |          |          |
| 65               | 1                | -4.62042                | 0.731044 | -0.97713 |        |        |          |          |          |
| 66               | 6                | -3.85753                | 3.798814 | 0.270293 |        |        |          |          |          |
| 67               | 1                | -1.9939                 | 4.327024 | 1.204044 |        |        |          |          |          |
| 68               | 6                | -6.32124                | 4.257493 | -0.92472 |        |        |          |          |          |
| 69               | 6                | -5.6345                 | 5.325444 | -0.32228 |        |        |          |          |          |
| 70               | 1                | -3.89173                | 5.82385  | 0.680239 |        |        |          |          |          |
| 71               | 6                | -7.49247                | 4.474873 | -1.63719 |        |        |          |          |          |
| 72               | 6                | -6.14855                | 6.618027 | -0.4534  |        |        |          |          |          |
| 73               | 6                | -8.0066                 | 5.772383 | -1.75573 |        |        |          |          |          |
| 74               | 1                | -7.99176                | 3.623065 | -2.08725 |        |        |          |          |          |
| 75               | 6                | -7.33297                | 6.840825 | -1.16393 |        |        |          |          |          |
| 76               | 1                | -5.62253                | 7.448538 | 0.010873 |        |        |          |          |          |
| 77               | 1                | -8.92569                | 5.938414 | -2.30812 |        |        |          |          |          |
| 78               | 1                | -7.72101                | 7.85074  | -1.25115 |        |        |          |          |          |
| 79               | 8                | -7.04404                | -1.67103 | 1.748739 |        |        |          |          |          |
| 80               | 8                | -5.86824                | 2.953061 | -0.80215 |        |        |          |          |          |
| 81               | 7                | -7.97609                | -3.37709 | -0.246   |        |        |          |          |          |

### JK-POZ

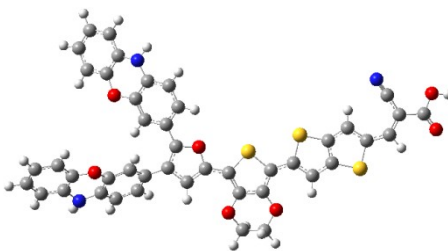

| center<br>Number | Atomic<br>Number | Coordinates (Angstroms) |          |          |
|------------------|------------------|-------------------------|----------|----------|
|                  |                  | X                       | Y        | Z        |
| 1                | 6                | -2.11411                | -1.66067 | -0.30932 |
| 2                | 6                | -3.30142                | -2.35044 | -0.37755 |
| 3                | 6                | -4.3557                 | -1.39054 | -0.26256 |
| 4                | 1                | -3.40708                | -3.42152 | -0.4574  |
| 5                | 6                | -3.74212                | -0.15172 | -0.14973 |
| 6                | 6                | -0.73949                | -2.05605 | -0.34686 |
| 7                | 6                | -0.22354                | -3.32934 | -0.5066  |
| 8                | 6                | 1.195372                | -3.37743 | -0.49138 |
| 9                | 6                | 1.801109                | -2.13856 | -0.3359  |
| 10               | 6                | -0.2623                 | -5.5737  | -1.14552 |
| 11               | 6                | 1.063501                | -5.71158 | -0.41505 |
| 12               | 1                | -0.89304                | -6.44904 | -0.97642 |
| 13               | 1                | 1.635534                | -6.55926 | -0.79801 |
| 14               | 6                | 3.205328                | -1.84045 | -0.28135 |
| 15               | 6                | 4.266791                | -2.71357 | -0.49292 |
| 16               | 6                | 5.431823                | -0.70206 | -0.03871 |
| 17               | 6                | 5.512093                | -2.06399 | -0.35281 |
| 18               | 1                | 4.123502                | -3.75605 | -0.73849 |
| 19               | 6                | 6.676958                | -0.05869 | 0.092833 |
| 20               | 6                | 7.738975                | -0.92825 | -0.12036 |
| 21               | 1                | 6.808177                | 0.990567 | 0.331054 |
| 22               | 16               | 7.172768                | -2.57051 | -0.49007 |
| 23               | 16               | 3.766856                | -0.19929 | 0.09977  |
| 24               | 16               | 0.562972                | -0.89259 | -0.19971 |
| 25               | 8                | -1.00085                | -4.4473  | -0.64497 |
| 26               | 8                | 1.885197                | -4.54922 | -0.62983 |
| 27               | 1                | -0.09449                | -5.4483  | -2.22315 |
| 28               | 1                | 0.897066                | -5.84047 | 0.661899 |
| 29               | 8                | -2.37673                | -0.32347 | -0.16869 |
| 30               | 6                | 9.144071                | -0.63931 | -0.07153 |
| 31               | 6                | 10.20464                | -1.51405 | -0.29571 |
| 32               | 16               | 9.71346                 | 0.976061 | 0.306241 |
| 33               | 6                | 11.43613                | -0.8699  | -0.16014 |
| 34               | 1                | 10.10252                | -2.56235 | -0.54512 |
| 35               | 6                | 11.40306                | 0.485927 | 0.163738 |
| 36               | 6                | 12.55309                | 1.293358 | 0.339111 |
| 37               | 6                | 12.67213                | 2.625109 | 0.655003 |
| 38               | 6                | 11.55228                | 3.478335 | 0.875439 |
| 39               | 6                | 14.04058                | 3.183325 | 0.767542 |
| 40               | 7                | 10.62158                | 4.158164 | 1.051671 |
| 41               | 1                | 14.96942                | 4.778152 | 1.13434  |
| 42               | 8                | 15.0669                 | 2.548511 | 0.600466 |
| 43               | 8                | 14.03996                | 4.500162 | 1.081975 |
| 44               | 1                | 13.4997                 | 0.774795 | 0.201225 |
| 45               | 6                | -5.79309                | -1.73088 | -0.22128 |
| 46               | 6                | -6.34708                | -2.59978 | -1.17171 |
| 47               | 6                | -6.6307                 | -1.23798 | 0.798312 |
| 48               | 6                | -7.69654                | -2.95952 | -1.11769 |
| 49               | 1                | -5.72495                | -2.98704 | -1.9726  |
| 50               | 6                | -7.96596                | -1.60343 | 0.852998 |
| 51               | 1                | -6.24412                | -0.5765  | 1.566067 |
| 52               | 6                | -8.52325                | -2.47038 | -0.10407 |
| 53               | 1                | -8.11086                | -3.6298  | -1.86664 |
| 54               | 6                | -10.1058                | -1.21062 | 1.795118 |
| 55               | 6                | -10.7031                | -2.0651  | 0.852992 |
| 56               | 1                | -10.3019                | -3.28233 | -0.76948 |
| 57               | 6                | -10.8794                | -0.45245 | 2.662959 |
| 58               | 6                | -12.0973                | -2.14106 | 0.800652 |
| 59               | 6                | -12.2762                | -0.54309 | 2.611736 |
| 60               | 1                | -10.3782                | 0.197511 | 3.37263  |
| 61               | 1                | -12.5667                | -2.80085 | 0.07506  |
| 62               | 6                | -12.8815                | -1.3867  | 1.680192 |
| 63               | 1                | -12.879                 | 0.045467 | 3.295639 |
| 64               | 1                | -13.9631                | -1.46273 | 1.629902 |
| 65               | 6                | -4.20008                | 1.228626 | -0.05809 |
| 66               | 6                | -3.36532                | 2.223285 | 0.481147 |
| 67               | 6                | -5.47158                | 1.610974 | -0.53833 |
| 68               | 6                | -3.78948                | 3.549314 | 0.55378  |
| 69               | 1                | -2.38062                | 1.957617 | 0.847672 |
| 70               | 6                | -5.88781                | 2.927105 | -0.45103 |
| 71               | 1                | -6.14185                | 0.890458 | -0.99066 |
| 72               | 6                | -5.05796                | 3.921353 | 0.099423 |
| 73               | 1                | -3.13415                | 4.304518 | 0.980149 |
| 74               | 6                | -7.48433                | 4.567036 | -1.08471 |
| 75               | 6                | -6.68489                | 5.588215 | -0.54316 |
| 76               | 1                | -4.88458                | 5.956483 | 0.411656 |
| 77               | 6                | -8.63925                | 4.866613 | -1.79401 |
| 78               | 6                | -7.06952                | 6.918121 | -0.7321  |
| 79               | 6                | -9.02331                | 6.202013 | -1.97048 |
| 80               | 1                | -9.22809                | 4.048665 | -2.19608 |
| 81               | 1                | -6.45597                | 7.712916 | -0.31511 |

| center<br>Number | Atomic<br>Number | Coordinates (Angstroms) |          |          |
|------------------|------------------|-------------------------|----------|----------|
|                  |                  | X                       | Y        | Z        |
| 82               | 6                | -8.23708                | 7.224479 | -1.43943 |
| 83               | 1                | -9.92999                | 6.432863 | -2.52007 |
| 84               | 1                | -8.52383                | 8.262927 | -1.57183 |
| 85               | 7                | -5.54402                | 5.226384 | 0.184549 |
| 86               | 7                | -9.87005                | -2.82621 | 0.021307 |
| 87               | 8                | -8.726                  | -1.12583 | 1.907908 |
| 88               | 8                | -7.16205                | 3.231166 | -0.90253 |
| 89               | 9                | 12.59925                | -1.52307 | -0.3334  |

### JK-POZ-1

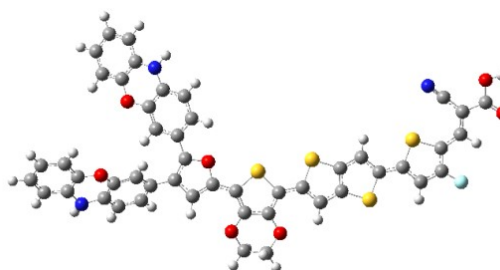

| center<br>Number | Atomic<br>Number | Coordinates (Angstroms) |          |          |
|------------------|------------------|-------------------------|----------|----------|
|                  |                  | X                       | Y        | Z        |
| 1                | 6                | -2.72475                | -1.61886 | -0.29518 |
| 2                | 6                | -3.89758                | -2.33291 | -0.36633 |
| 3                | 6                | -4.97157                | -1.39449 | -0.25923 |
| 4                | 1                | -3.9811                 | -3.40617 | -0.44316 |
| 5                | 6                | -4.38381                | -0.1429  | -0.14778 |
| 6                | 6                | -1.34251                | -1.98647 | -0.32491 |
| 7                | 6                | -0.80038                | -3.25003 | -0.47683 |
| 8                | 6                | 0.618887                | -3.26958 | -0.45468 |
| 9                | 6                | 1.199095                | -2.01788 | -0.30198 |
| 10               | 6                | -0.79112                | -5.49717 | -1.10695 |
| 11               | 6                | 0.53353                 | -5.60568 | -0.36956 |
| 12               | 1                | -1.40509                | -6.38424 | -0.93736 |
| 13               | 1                | 1.124507                | -6.4429  | -0.74665 |
| 14               | 6                | 2.596466                | -1.69192 | -0.24262 |
| 15               | 6                | 3.676156                | -2.5468  | -0.43748 |
| 16               | 6                | 4.798974                | -0.50772 | -0.00024 |
| 17               | 6                | 4.907477                | -1.87169 | -0.29771 |
| 18               | 1                | 3.554613                | -3.59471 | -0.67127 |
| 19               | 6                | 6.030691                | 0.160621 | 0.131711 |
| 20               | 6                | 7.110534                | -0.69114 | -0.06433 |
| 21               | 1                | 6.140371                | 1.214837 | 0.358766 |
| 22               | 16               | 6.578175                | -2.34823 | -0.41842 |
| 23               | 16               | 3.123882                | -0.03552 | 0.121851 |
| 24               | 16               | -0.06447                | -0.79643 | -0.1763  |
| 25               | 8                | -1.55449                | -4.3837  | -0.61441 |
| 26               | 8                | 1.332718                | -4.42759 | -0.58452 |
| 27               | 1                | -0.62071                | -5.37257 | -2.18424 |
| 28               | 1                | 0.364557                | -5.73397 | 0.707038 |
| 29               | 8                | -3.01519                | -0.28682 | -0.16021 |
| 30               | 6                | 8.509681                | -0.37535 | -0.00987 |
| 31               | 6                | 9.590613                | -1.23215 | -0.21108 |
| 32               | 16               | 9.061396                | 1.243161 | 0.342039 |
| 33               | 6                | 10.83256                | -0.59414 | -0.08386 |
| 34               | 1                | 9.483925                | -2.28385 | -0.44247 |
| 35               | 6                | 10.7522                 | 0.773659 | 0.219202 |
| 36               | 6                | 11.85615                | 1.654243 | 0.401665 |
| 37               | 6                | 11.89107                | 2.99416  | 0.697647 |
| 38               | 6                | 10.72976                | 3.797598 | 0.888304 |
| 39               | 6                | 13.22878                | 3.629742 | 0.823439 |
| 40               | 7                | 9.771828                | 4.443984 | 1.041957 |
| 41               | 1                | 14.05964                | 5.280448 | 1.1796   |
| 42               | 8                | 14.2882                 | 3.047654 | 0.682799 |
| 43               | 8                | 13.14885                | 4.947826 | 1.116113 |
| 44               | 1                | 12.84                   | 1.206102 | 0.291669 |
| 45               | 6                | -6.40191                | -1.76411 | -0.2235  |
| 46               | 6                | -6.9342                 | -2.64436 | -1.17585 |
| 47               | 6                | -7.25336                | -1.2882  | 0.792688 |
| 48               | 6                | -8.27623                | -3.03158 | -1.12703 |
| 49               | 1                | -6.30112                | -3.019   | -1.97416 |
| 50               | 6                | -8.58107                | -1.68089 | 0.842285 |
| 51               | 1                | -6.88341                | -0.61874 | 1.561735 |
| 52               | 6                | -9.11674                | -2.55925 | -0.11678 |
| 53               | 1                | -8.67382                | -3.71033 | -1.87741 |
| 54               | 6                | -10.7322                | -1.33205 | 1.77614  |
| 55               | 6                | -11.3081                | -2.19873 | 0.831908 |
| 56               | 1                | -10.8757                | -3.40795 | -0.78867 |
| 57               | 6                | -11.5245                | -0.59007 | 2.641061 |
| 58               | 6                | -12.7002                | -2.30354 | 0.774367 |
| 59               | 6                | -12.9189                | -0.7096  | 2.584642 |
| 60               | 1                | -11.0395                | 0.070099 | 3.352571 |
| 61               | 1                | -13.1531                | -2.97292 | 0.04711  |
| 62               | 6                | -13.5031                | -1.56555 | 1.650921 |
| 63               | 1                | -13.5363                | -0.13367 | 3.266268 |
| 64               | 1                | -14.5827                | -1.66396 | 1.596628 |
| 65               | 6                | -4.87035                | 1.227917 | -0.06245 |
| 66               | 6                | -4.05703                | 2.241921 | 0.473601 |
| 67               | 6                | -6.14912                | 1.581809 | -0.54533 |
| 68               | 6                | -4.50883                | 3.55904  | 0.540677 |
| 69               | 1                | -3.06739                | 1.998338 | 0.842142 |
| 70               | 6                | -6.59281                | 2.889255 | -0.46359 |
| 71               | 1                | -6.80386                | 0.845742 | -0.99531 |
| 72               | 6                | -5.78439                | 3.902795 | 0.083721 |
| 73               | 1                | -3.86985                | 4.329402 | 0.964716 |
| 74               | 6                | -8.22381                | 4.492856 | -1.10296 |
| 75               | 6                | -7.44634                | 5.532582 | -0.56477 |
| 76               | 1                | -5.65422                | 5.942286 | 0.389081 |
| 77               | 6                | -9.3853                 | 4.765419 | -1.8124  |
| 78               | 6                | -7.85964                | 6.853338 | -0.75722 |
| 79               | 6                | -9.79813                | 6.091721 | -1.99246 |
| 80               | 1                | -9.95659                | 3.933827 | -2.21179 |
| 81               | 1                | -7.26319                | 7.662361 | -0.34281 |

| center<br>Number | Atomic<br>Number | Coordinates (Angstroms) |          |          |
|------------------|------------------|-------------------------|----------|----------|
|                  |                  | X                       | Y        | Z        |
| 82               | 6                | -9.03387                | 7.132424 | -1.46479 |
| 83               | 1                | -10.7099                | 6.301389 | -2.54218 |
| 84               | 1                | -9.34302                | 8.164059 | -1.59998 |
| 85               | 7                | -6.29752                | 5.197564 | 0.163248 |
| 86               | 7                | -10.4564                | -2.94243 | 0.003374 |
| 87               | 8                | -9.35479                | -1.21867 | 1.894018 |
| 88               | 8                | -7.87262                | 3.164736 | -0.91745 |
| 89               | 6                | 12.13058                | -1.3342  | -0.26189 |
| 90               | 9                | 12.87869                | -0.82104 | -1.27183 |
| 91               | 9                | 12.90284                | -1.28993 | 0.853798 |
| 92               | 9                | 11.92232                | -2.64073 | -0.5477  |

### JK-POZ-2

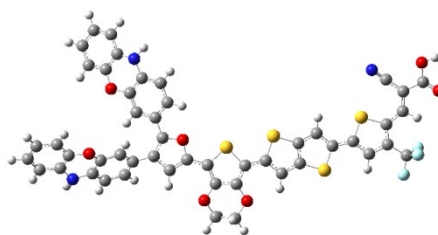

| center Number | Atomic Number | Coordinates (Angstroms) |          |          | center Number | Atomic Number | Coordinates (Angstroms) |          |          |
|---------------|---------------|-------------------------|----------|----------|---------------|---------------|-------------------------|----------|----------|
|               |               | X                       | Y        | Z        |               |               | X                       | Y        | Z        |
| 1             | 6             | -2.22232                | -1.64976 | -0.30471 | 81            | 1             | -6.62661                | 7.695656 | -0.32508 |
| 2             | 6             | -3.4056                 | -2.34667 | -0.37416 | 82            | 6             | -8.40578                | 7.193675 | -1.44649 |
| 3             | 6             | -4.46556                | -1.39319 | -0.26243 | 83            | 1             | -10.0945                | 6.389193 | -2.52416 |
| 4             | 1             | -3.50478                | -3.41846 | -0.45288 | 84            | 1             | -8.7003                 | 8.229922 | -1.579   |
| 5             | 6             | -3.85937                | -0.15035 | -0.15005 | 85            | 7             | -5.69566                | 5.216082 | 0.174046 |
| 6             | 6             | -0.84583                | -2.03731 | -0.3392  | 86            | 7             | -9.97142                | -2.86149 | 0.013584 |
| 7             | 6             | -0.32267                | -3.30833 | -0.49668 | 87            | 8             | -8.83983                | -1.15539 | 1.902604 |
| 8             | 6             | 1.096061                | -3.34864 | -0.47903 | 88            | 8             | -7.30085                | 3.20853  | -0.90939 |
| 9             | 6             | 1.694916                | -2.10577 | -0.3242  | 89            | 6             | 12.58462                | -1.50904 | -0.30836 |
| 10            | 6             | -0.34818                | -5.55266 | -1.13566 | 90            | 7             | 13.58176                | -2.09188 | -0.45404 |
| 11            | 6             | 0.97693                 | -5.68379 | -0.40281 |               |               |                         |          |          |
| 12            | 1             | -0.9745                 | -6.4314  | -0.96798 |               |               |                         |          |          |
| 13            | 1             | 1.554754                | -6.52755 | -0.7856  |               |               |                         |          |          |
| 14            | 6             | 3.096787                | -1.80066 | -0.26807 |               |               |                         |          |          |
| 15            | 6             | 4.163316                | -2.67085 | -0.46918 |               |               |                         |          |          |
| 16            | 6             | 5.316985                | -0.64967 | -0.02876 |               |               |                         |          |          |
| 17            | 6             | 5.404527                | -2.01424 | -0.33113 |               |               |                         |          |          |
| 18            | 1             | 4.025653                | -3.71606 | -0.70605 |               |               |                         |          |          |
| 19            | 6             | 6.558741                | -0.00017 | 0.101298 |               |               |                         |          |          |
| 20            | 6             | 7.625109                | -0.86724 | -0.10114 |               |               |                         |          |          |
| 21            | 1             | 6.684229                | 1.051689 | 0.331185 |               |               |                         |          |          |
| 22            | 16            | 7.067581                | -2.515   | -0.45884 |               |               |                         |          |          |
| 23            | 16            | 3.649426                | -0.15336 | 0.100109 |               |               |                         |          |          |
| 24            | 16            | 0.449641                | -0.86639 | -0.19067 |               |               |                         |          |          |
| 25            | 8             | -1.09364                | -4.43029 | -0.6358  |               |               |                         |          |          |
| 26            | 8             | 1.792569                | -4.51616 | -0.61461 |               |               |                         |          |          |
| 27            | 1             | -0.17936                | -5.42577 | -2.21292 |               |               |                         |          |          |
| 28            | 1             | 0.80947                 | -5.81456 | 0.673675 |               |               |                         |          |          |
| 29            | 8             | -2.49308                | -0.3139  | -0.16624 |               |               |                         |          |          |
| 30            | 6             | 9.028975                | -0.57177 | -0.05027 |               |               |                         |          |          |
| 31            | 6             | 10.09625                | -1.43843 | -0.26157 |               |               |                         |          |          |
| 32            | 16            | 9.600302                | 1.043354 | 0.31308  |               |               |                         |          |          |
| 33            | 6             | 11.35179                | -0.81065 | -0.13322 |               |               |                         |          |          |
| 34            | 1             | 9.982803                | -2.48835 | -0.50113 |               |               |                         |          |          |
| 35            | 6             | 11.28176                | 0.559792 | 0.181198 |               |               |                         |          |          |
| 36            | 6             | 12.4115                 | 1.404203 | 0.360434 |               |               |                         |          |          |
| 37            | 6             | 12.48638                | 2.740015 | 0.665208 |               |               |                         |          |          |
| 38            | 6             | 11.34388                | 3.566921 | 0.868716 |               |               |                         |          |          |
| 39            | 6             | 13.84055                | 3.341802 | 0.78608  |               |               |                         |          |          |
| 40            | 7             | 10.3975                 | 4.227818 | 1.031801 |               |               |                         |          |          |
| 41            | 1             | 14.71259                | 4.970282 | 1.148123 |               |               |                         |          |          |
| 42            | 8             | 14.88291                | 2.733694 | 0.633821 |               |               |                         |          |          |
| 43            | 8             | 13.79392                | 4.659087 | 1.088305 |               |               |                         |          |          |
| 44            | 1             | 13.37716                | 0.916573 | 0.236857 |               |               |                         |          |          |
| 45            | 6             | -5.901                  | -1.74201 | -0.22329 |               |               |                         |          |          |
| 46            | 6             | -6.44855                | -2.61363 | -1.17492 |               |               |                         |          |          |
| 47            | 6             | -6.74272                | -1.25457 | 0.795552 |               |               |                         |          |          |
| 48            | 6             | -7.79592                | -2.98135 | -1.12277 |               |               |                         |          |          |
| 49            | 1             | -5.82319                | -2.99676 | -1.97528 |               |               |                         |          |          |
| 50            | 6             | -8.07585                | -1.62796 | 0.848456 |               |               |                         |          |          |
| 51            | 1             | -6.36105                | -0.59121 | 1.56416  |               |               |                         |          |          |
| 52            | 6             | -8.62679                | -2.49771 | -0.10987 |               |               |                         |          |          |
| 53            | 1             | -8.20533                | -3.65362 | -1.87262 |               |               |                         |          |          |
| 54            | 6             | -10.2191                | -1.24941 | 1.788948 |               |               |                         |          |          |
| 55            | 6             | -10.81                  | -2.10692 | 0.845657 |               |               |                         |          |          |
| 56            | 1             | -10.3996                | -3.32081 | -0.77731 |               |               |                         |          |          |
| 57            | 6             | -10.9982                | -0.49734 | 2.657118 |               |               |                         |          |          |
| 58            | 6             | -12.2036                | -2.19224 | 0.792398 |               |               |                         |          |          |
| 59            | 6             | -12.3943                | -0.59728 | 2.604942 |               |               |                         |          |          |
| 60            | 1             | -10.5018                | 0.155194 | 3.367811 |               |               |                         |          |          |
| 61            | 1             | -12.6682                | -2.85445 | 0.065902 |               |               |                         |          |          |
| 62            | 6             | -12.9934                | -1.444   | 1.672208 |               |               |                         |          |          |
| 63            | 1             | -13.0014                | -0.0135  | 3.289094 |               |               |                         |          |          |
| 64            | 1             | -14.0744                | -1.52725 | 1.621227 |               |               |                         |          |          |
| 65            | 6             | -4.32605                | 1.227049 | -0.06106 |               |               |                         |          |          |
| 66            | 6             | -3.49771                | 2.228081 | 0.47635  |               |               |                         |          |          |
| 67            | 6             | -5.6001                 | 1.600211 | -0.54196 |               |               |                         |          |          |
| 68            | 6             | -3.93047                | 3.551381 | 0.546643 |               |               |                         |          |          |
| 69            | 1             | -2.51137                | 1.969491 | 0.843528 |               |               |                         |          |          |
| 70            | 6             | -6.02485                | 2.913713 | -0.45725 |               |               |                         |          |          |
| 71            | 1             | -6.26575                | 0.874504 | -0.99278 |               |               |                         |          |          |
| 72            | 6             | -5.20137                | 3.914399 | 0.091478 |               |               |                         |          |          |
| 73            | 1             | -3.28017                | 4.311601 | 0.971756 |               |               |                         |          |          |
| 74            | 6             | -7.63323                | 4.541995 | -1.09158 |               |               |                         |          |          |
| 75            | 6             | -6.84047                | 5.569233 | -0.55182 |               |               |                         |          |          |
| 76            | 1             | -5.04195                | 5.951047 | 0.401895 |               |               |                         |          |          |
| 77            | 6             | -8.79138                | 4.832734 | -1.79924 |               |               |                         |          |          |
| 78            | 6             | -7.23498                | 6.896207 | -0.74074 |               |               |                         |          |          |
| 79            | 6             | -9.18533                | 6.165224 | -1.97583 |               |               |                         |          |          |
| 80            | 1             | -9.37491                | 4.010341 | -2.19996 |               |               |                         |          |          |

### JK-POZ-3

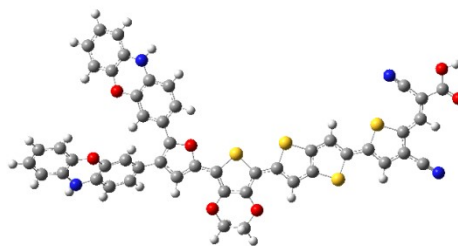

| center<br>Number | Atomic<br>Number | Coordinates (Angstroms) |          |          |
|------------------|------------------|-------------------------|----------|----------|
|                  |                  | X                       | Y        | Z        |
| 1                | 6                | -0.11906                | -1.5388  | -0.2951  |
| 2                | 6                | -1.22619                | -2.34233 | -0.43361 |
| 3                | 6                | -2.37654                | -1.51081 | -0.25825 |
| 4                | 1                | -1.21715                | -3.4088  | -0.59916 |
| 5                | 6                | -1.89856                | -0.22735 | -0.04002 |
| 6                | 6                | 1.289848                | -1.78254 | -0.34367 |
| 7                | 6                | 1.938194                | -2.97849 | -0.59576 |
| 8                | 6                | 3.353607                | -2.87811 | -0.56426 |
| 9                | 6                | 3.823481                | -1.59766 | -0.30309 |
| 10               | 6                | 2.140795                | -5.15542 | -1.41216 |
| 11               | 6                | 3.469252                | -5.21199 | -0.67598 |
| 12               | 1                | 1.605146                | -6.10279 | -1.32225 |
| 13               | 1                | 4.130913                | -5.95969 | -1.11803 |
| 14               | 6                | 5.186579                | -1.15874 | -0.20357 |
| 15               | 6                | 6.335075                | -1.90146 | -0.45885 |
| 16               | 6                | 7.277738                | 0.184632 | 0.157339 |
| 17               | 6                | 7.505181                | -1.14112 | -0.25303 |
| 18               | 1                | 6.302894                | -2.93262 | -0.77986 |
| 19               | 6                | 8.435821                | 0.946406 | 0.358288 |
| 20               | 6                | 9.595252                | 0.20796  | 0.101945 |
| 21               | 1                | 8.451675                | 1.981461 | 0.67308  |
| 22               | 6                | 10.96936                | 0.56549  | 0.174543 |
| 23               | 6                | 11.55699                | 1.759142 | 0.525626 |
| 24               | 6                | 13.03653                | 1.825258 | 0.506042 |
| 25               | 6                | 10.81508                | 2.914907 | 0.901235 |
| 26               | 8                | 13.7722                 | 0.901948 | 0.202598 |
| 27               | 8                | 13.50693                | 3.042462 | 0.868056 |
| 28               | 1                | 14.47637                | 2.993773 | 0.827229 |
| 29               | 1                | 11.6885                 | -0.20988 | -0.08318 |
| 30               | 16               | 9.202859                | -1.45795 | -0.39523 |
| 31               | 16               | 5.565674                | 0.500405 | 0.301835 |
| 32               | 16               | 2.459321                | -0.50401 | -0.08564 |
| 33               | 7                | 10.17219                | 3.839641 | 1.203056 |
| 34               | 8                | 1.284206                | -4.15649 | -0.83385 |
| 35               | 8                | 4.16393                 | -3.95509 | -0.78362 |
| 36               | 1                | 2.300259                | -4.92627 | -2.47378 |
| 37               | 1                | 3.311747                | -5.44532 | 0.384493 |
| 38               | 8                | -0.52308                | -0.25221 | -0.05352 |
| 39               | 6                | -3.77119                | -2.00031 | -0.26413 |
| 40               | 6                | -4.65607                | -1.69872 | 0.785921 |
| 41               | 6                | -4.23519                | -2.8242  | -1.30102 |
| 42               | 6                | -5.95286                | -2.20921 | 0.80944  |
| 43               | 1                | -4.31931                | -1.07516 | 1.608413 |
| 44               | 6                | -5.54329                | -3.30713 | -1.30317 |
| 45               | 1                | -3.57659                | -3.06655 | -2.12962 |
| 46               | 6                | -6.41731                | -3.01284 | -0.24905 |
| 47               | 1                | -5.89174                | -3.92051 | -2.13082 |
| 48               | 6                | -8.59122                | -1.99273 | 1.457813 |
| 49               | 6                | -8.79807                | -2.81194 | 0.333406 |
| 50               | 1                | -7.97028                | -4.0612  | -1.0522  |
| 51               | 6                | -9.65931                | -1.2808  | 2.008743 |
| 52               | 6                | -10.0872                | -2.92008 | -0.20497 |
| 53               | 1                | -9.48038                | -0.63359 | 2.862234 |
| 54               | 6                | -10.9471                | -1.41144 | 1.481263 |
| 55               | 6                | -11.1579                | -2.23827 | 0.375899 |
| 56               | 1                | -10.2489                | -3.54697 | -1.0789  |
| 57               | 1                | -11.7726                | -0.86729 | 1.928619 |
| 58               | 1                | -12.1521                | -2.34511 | -0.04718 |
| 59               | 6                | -2.50084                | 1.086178 | 0.153847 |
| 60               | 6                | -1.777                  | 2.117391 | 0.781568 |
| 61               | 6                | -3.79936                | 1.375079 | -0.31084 |
| 62               | 6                | -2.33158                | 3.383162 | 0.938168 |
| 63               | 1                | -0.77107                | 1.927318 | 1.138065 |
| 64               | 6                | -4.3719                 | 2.628511 | -0.1141  |
| 65               | 1                | -4.37193                | 0.613424 | -0.82743 |
| 66               | 6                | -3.63646                | 3.657459 | 0.504872 |
| 67               | 1                | -1.74988                | 4.170812 | 1.411034 |
| 68               | 6                | -6.02828                | 4.650446 | -0.90305 |
| 69               | 6                | -5.13064                | 5.479146 | -0.20591 |
| 70               | 1                | -3.58408                | 5.598818 | 1.122139 |
| 71               | 6                | -6.93857                | 5.210629 | -1.80248 |
| 72               | 6                | -5.18018                | 6.864696 | -0.41007 |
| 73               | 6                | -6.99806                | 6.59519  | -1.9847  |
| 74               | 1                | -7.61225                | 4.557538 | -2.34945 |
| 75               | 6                | -6.11897                | 7.420615 | -1.28062 |
| 76               | 1                | -4.48215                | 7.506746 | 0.122181 |
| 77               | 1                | -7.72182                | 7.019772 | -2.67295 |
| 78               | 1                | -6.15052                | 8.497407 | -1.41558 |
| 79               | 7                | -7.72443                | -3.52077 | -0.23371 |
| 80               | 7                | -4.20198                | 4.924424 | 0.691153 |
| 81               | 16               | -6.08022                | 2.899164 | -0.55757 |

| center<br>Number | Atomic<br>Number | Coordinates (Angstroms) |          |          |
|------------------|------------------|-------------------------|----------|----------|
|                  |                  | X                       | Y        | Z        |
| 82               | 16               | -6.98686                | -1.94712 | 2.241285 |

JK-PTZ

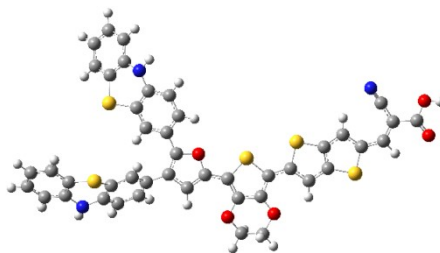

| center<br>Number | Atomic<br>Number | Coordinates (Angstroms) |          |          |
|------------------|------------------|-------------------------|----------|----------|
|                  |                  | X                       | Y        | Z        |
| 1                | 6                | -1.84088                | -1.76655 | -0.27534 |
| 2                | 6                | -3.02311                | -2.46345 | -0.35702 |
| 3                | 6                | -4.08366                | -1.51643 | -0.199   |
| 4                | 1                | -3.12096                | -3.53188 | -0.47407 |
| 5                | 6                | -3.47943                | -0.27781 | -0.04816 |
| 6                | 6                | -0.46331                | -2.14901 | -0.33962 |
| 7                | 6                | 0.060516                | -3.41189 | -0.54758 |
| 8                | 6                | 1.480058                | -3.44912 | -0.54788 |
| 9                | 6                | 2.077539                | -2.21148 | -0.35635 |
| 10               | 6                | 0.032678                | -5.63415 | -1.26097 |
| 11               | 6                | 1.366739                | -5.78542 | -0.5485  |
| 12               | 1                | -0.58978                | -6.51942 | -1.11448 |
| 13               | 1                | 1.941315                | -6.61538 | -0.96495 |
| 14               | 6                | 3.480204                | -1.90404 | -0.3057  |
| 15               | 6                | 4.545709                | -2.761   | -0.5578  |
| 16               | 6                | 5.700257                | -0.75712 | -0.04697 |
| 17               | 6                | 5.787608                | -2.10673 | -0.40824 |
| 18               | 1                | 4.407771                | -3.79559 | -0.83744 |
| 19               | 6                | 6.941962                | -0.10869 | 0.093811 |
| 20               | 6                | 8.007968                | -0.96214 | -0.15981 |
| 21               | 1                | 7.067758                | 0.932792 | 0.366539 |
| 22               | 16               | 7.45048                 | -2.59512 | -0.57974 |
| 23               | 16               | 4.033169                | -0.27256 | 0.125672 |
| 24               | 16               | 0.831541                | -0.98082 | -0.1658  |
| 25               | 8                | -0.70945                | -4.53044 | -0.7165  |
| 26               | 8                | 2.177249                | -4.61001 | -0.73292 |
| 27               | 1                | 0.188536                | -5.47208 | -2.33547 |
| 28               | 1                | 1.212298                | -5.95109 | 0.525191 |
| 29               | 8                | -2.11301                | -0.43736 | -0.08543 |
| 30               | 6                | 9.411557                | -0.66398 | -0.11551 |
| 31               | 6                | 10.47612                | -1.52278 | -0.37815 |
| 32               | 16               | 9.972523                | 0.942705 | 0.30837  |
| 33               | 6                | 11.70421                | -0.87374 | -0.23392 |
| 34               | 1                | 10.37937                | -2.56334 | -0.66005 |
| 35               | 6                | 11.66409                | 0.470582 | 0.133809 |
| 36               | 6                | 12.80993                | 1.280979 | 0.323911 |
| 37               | 6                | 12.92192                | 2.602677 | 0.681222 |
| 38               | 6                | 11.79779                | 3.439472 | 0.93969  |
| 39               | 6                | 14.28728                | 3.16794  | 0.798438 |
| 40               | 7                | 10.86362                | 4.105766 | 1.146549 |
| 41               | 1                | 15.20726                | 4.757764 | 1.207175 |
| 42               | 8                | 15.31653                | 2.546825 | 0.601126 |
| 43               | 8                | 14.27956                | 4.473905 | 1.154832 |
| 44               | 1                | 13.75898                | 0.774518 | 0.160247 |
| 45               | 6                | -5.51884                | -1.86761 | -0.15742 |
| 46               | 6                | -6.08324                | -2.6862  | -1.1477  |
| 47               | 6                | -6.34665                | -1.43726 | 0.894292 |
| 48               | 6                | -7.43129                | -3.04003 | -1.10397 |
| 49               | 1                | -5.46979                | -3.02635 | -1.97657 |
| 50               | 6                | -7.6855                 | -1.8187  | 0.964792 |
| 51               | 1                | -5.9329                 | -0.81483 | 1.68177  |
| 52               | 6                | -8.24872                | -2.61821 | -0.0478  |
| 53               | 1                | -7.85574                | -3.65162 | -1.89674 |
| 54               | 6                | -10.2757                | -1.32322 | 1.653614 |
| 55               | 6                | -10.5856                | -2.16547 | 0.570626 |
| 56               | 1                | -9.91267                | -3.54514 | -0.77442 |
| 57               | 6                | -11.2585                | -0.49021 | 2.193461 |
| 58               | 6                | -11.8915                | -2.17243 | 0.062729 |
| 59               | 6                | -12.565                 | -0.51934 | 1.697493 |
| 60               | 1                | -10.9991                | 0.172086 | 3.01408  |
| 61               | 1                | -12.1323                | -2.81711 | -0.77948 |
| 62               | 6                | -12.879                 | -1.36782 | 0.633803 |
| 63               | 1                | -13.3247                | 0.119354 | 2.136527 |
| 64               | 1                | -13.8885                | -1.39689 | 0.235265 |
| 65               | 6                | -3.94783                | 1.095481 | 0.095862 |
| 66               | 6                | -3.11591                | 2.077684 | 0.665451 |
| 67               | 6                | -5.22113                | 1.48896  | -0.36158 |
| 68               | 6                | -3.54282                | 3.397065 | 0.773432 |
| 69               | 1                | -2.1262                 | 1.806183 | 1.014636 |
| 70               | 6                | -5.66627                | 2.799473 | -0.21258 |
| 71               | 1                | -5.87428                | 0.764952 | -0.83491 |
| 72               | 6                | -4.82335                | 3.777806 | 0.348381 |
| 73               | 1                | -2.87881                | 4.144249 | 1.201502 |
| 74               | 6                | -7.13292                | 4.936879 | -1.0693  |
| 75               | 6                | -6.14657                | 5.703726 | -0.42302 |
| 76               | 1                | -4.5727                 | 5.729823 | 0.877493 |
| 77               | 6                | -8.00032                | 5.543143 | -1.98119 |
| 78               | 6                | -6.06467                | 7.077027 | -0.68999 |
| 79               | 6                | -7.92807                | 6.91741  | -2.22595 |
| 80               | 1                | -8.74397                | 4.935546 | -2.48849 |
| 81               | 1                | -5.29808                | 7.670559 | -0.1972  |

| center<br>Number | Atomic<br>Number | Coordinates (Angstroms) |          |          |
|------------------|------------------|-------------------------|----------|----------|
|                  |                  | X                       | Y        | Z        |
| 82               | 6                | -6.96034                | 7.683111 | -1.57244 |
| 83               | 1                | -8.61926                | 7.379958 | -2.92317 |
| 84               | 1                | -6.88938                | 8.750755 | -1.75631 |
| 85               | 7                | -5.26099                | 5.100805 | 0.486408 |
| 86               | 7                | -9.59768                | -2.99703 | 0.014722 |
| 87               | 9                | 12.87031                | -1.51193 | -0.43942 |
| 88               | 16               | -7.34841                | 3.21609  | -0.6433  |
| 89               | 16               | -8.65633                | -1.39811 | 2.403127 |

### JK-PTZ-1

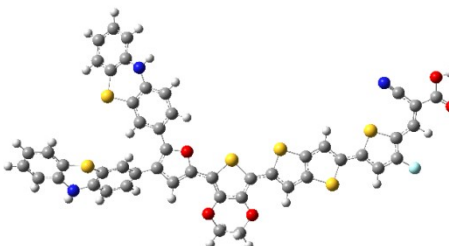



| center<br>Number | Atomic<br>Number | Coordinates (Angstroms) |          |          |
|------------------|------------------|-------------------------|----------|----------|
|                  |                  | X                       | Y        | Z        |
| 1                | 6                | -2.44265                | -1.72309 | -0.25218 |
| 2                | 6                | -3.61038                | -2.44388 | -0.33675 |
| 3                | 6                | -4.69038                | -1.51762 | -0.18922 |
| 4                | 1                | -3.68626                | -3.5146  | -0.44908 |
| 5                | 6                | -4.11179                | -0.26632 | -0.0413  |
| 6                | 6                | -1.05764                | -2.07838 | -0.30704 |
| 7                | 6                | -0.50789                | -3.33195 | -0.50545 |
| 8                | 6                | 0.911877                | -3.34112 | -0.49815 |
| 9                | 6                | 1.483904                | -2.09065 | -0.3103  |
| 10               | 6                | -0.48809                | -5.55784 | -1.20765 |
| 11               | 6                | 0.844818                | -5.67927 | -0.48741 |
| 12               | 1                | -1.09378                | -6.45443 | -1.05991 |
| 13               | 1                | 1.438098                | -6.49944 | -0.89691 |
| 14               | 6                | 2.879634                | -1.75572 | -0.25435 |
| 15               | 6                | 3.963132                | -2.59423 | -0.49267 |
| 16               | 6                | 5.075566                | -0.56382 | 0.006643 |
| 17               | 6                | 5.191027                | -1.91488 | -0.34205 |
| 18               | 1                | 3.84682                 | -3.63374 | -0.76369 |
| 19               | 6                | 6.303791                | 0.109212 | 0.149002 |
| 20               | 6                | 7.387439                | -0.72613 | -0.09068 |
| 21               | 1                | 6.408106                | 1.155232 | 0.413384 |
| 22               | 16               | 6.863719                | -2.3732  | -0.49945 |
| 23               | 16               | 3.398578                | -0.10986 | 0.165235 |
| 24               | 16               | 0.212812                | -0.88384 | -0.13249 |
| 25               | 8                | -1.25474                | -4.46618 | -0.67262 |
| 26               | 8                | 1.632844                | -4.48867 | -0.67301 |
| 27               | 1                | -0.32982                | -5.39799 | -2.2821  |
| 28               | 1                | 0.688064                | -5.84292 | 0.586219 |
| 29               | 8                | -2.74232                | -0.39867 | -0.07035 |
| 30               | 6                | 8.784983                | -0.40132 | -0.04082 |
| 31               | 6                | 9.869767                | -1.24119 | -0.28663 |
| 32               | 16               | 9.32833                 | 1.207248 | 0.364916 |
| 33               | 6                | 11.10833                | -0.59823 | -0.15023 |
| 34               | 1                | 9.768404                | -2.28433 | -0.55605 |
| 35               | 6                | 11.02093                | 0.756462 | 0.204787 |
| 36               | 6                | 12.12032                | 1.63874  | 0.407229 |
| 37               | 6                | 12.14826                | 2.966716 | 0.752801 |
| 38               | 6                | 10.98302                | 3.752809 | 0.987027 |
| 39               | 6                | 13.48254                | 3.608289 | 0.886693 |
| 40               | 7                | 10.0219                 | 4.384918 | 1.175975 |
| 41               | 1                | 14.30438                | 5.251544 | 1.294752 |
| 42               | 8                | 14.54455                | 3.040475 | 0.711934 |
| 43               | 8                | 13.39563                | 4.913693 | 1.229415 |
| 44               | 1                | 13.10622                | 1.20312  | 0.268927 |
| 45               | 6                | -6.11845                | -1.89736 | -0.1539  |
| 46               | 6                | -6.66106                | -2.73034 | -1.14434 |
| 47               | 6                | -6.9602                 | -1.48033 | 0.892103 |
| 48               | 6                | -8.00193                | -3.11104 | -1.10639 |
| 49               | 1                | -6.03658                | -3.06082 | -1.96888 |
| 50               | 6                | -8.29144                | -1.88842 | 0.957019 |
| 51               | 1                | -6.56318                | -0.84709 | 1.679597 |
| 52               | 6                | -8.8332                 | -2.70233 | -0.05586 |
| 53               | 1                | -8.40983                | -3.73362 | -1.89928 |
| 54               | 6                | -10.8946                | -1.44348 | 1.631358 |
| 55               | 6                | -11.1819                | -2.29511 | 0.549488 |
| 56               | 1                | -10.4744                | -3.66481 | -0.78805 |
| 57               | 6                | -11.8969                | -0.62909 | 2.163816 |
| 58               | 6                | -12.4849                | -2.33024 | 0.03524  |
| 59               | 6                | -13.2                   | -0.68633 | 1.661543 |
| 60               | 1                | -11.6551                | 0.040822 | 2.983648 |
| 61               | 1                | -12.7082                | -2.98223 | -0.80613 |
| 62               | 6                | -13.4914                | -1.54423 | 0.598974 |
| 63               | 1                | -13.9747                | -0.06197 | 2.094904 |
| 64               | 1                | -14.4981                | -1.59512 | 0.195594 |
| 65               | 6                | -4.60837                | 1.09789  | 0.093401 |
| 66               | 6                | -3.79843                | 2.099965 | 0.660093 |
| 67               | 6                | -5.88798                | 1.462865 | -0.37019 |
| 68               | 6                | -4.25238                | 3.410945 | 0.759321 |
| 69               | 1                | -2.80458                | 1.850616 | 1.013992 |
| 70               | 6                | -6.36011                | 2.764829 | -0.22998 |
| 71               | 1                | -6.52483                | 0.723107 | -0.84135 |
| 72               | 6                | -5.539                  | 3.763246 | 0.328063 |
| 73               | 1                | -3.6051                 | 4.173823 | 1.185324 |
| 74               | 6                | -7.86763                | 4.867033 | -1.10259 |
| 75               | 6                | -6.89903                | 5.657419 | -0.45787 |
| 76               | 1                | -5.32973                | 5.722855 | 0.846892 |
| 77               | 6                | -8.74467                | 5.450454 | -2.02014 |
| 78               | 6                | -6.84448                | 7.03063  | -0.73211 |
| 79               | 6                | -8.69985                | 6.824567 | -2.27223 |
| 80               | 1                | -9.47433                | 4.825056 | -2.52613 |
| 81               | 1                | -6.09159                | 7.642398 | -0.24049 |

| center<br>Number | Atomic<br>Number | Coordinates (Angstroms) |          |          |
|------------------|------------------|-------------------------|----------|----------|
|                  |                  | X                       | Y        | Z        |
| 82               | 6                | -7.74984                | 7.613457 | -1.62031 |
| 83               | 1                | -9.39839                | 7.269057 | -2.97384 |
| 84               | 1                | -7.70022                | 8.681319 | -1.80981 |
| 85               | 7                | -6.00374                | 5.077727 | 0.457173 |
| 86               | 7                | -10.1745                | -3.10794 | 0.000854 |
| 87               | 6                | 12.40987                | -1.32045 | -0.37098 |
| 88               | 9                | 13.14235                | -0.76292 | -1.36875 |
| 89               | 9                | 13.1944                 | -1.31261 | 0.736911 |
| 90               | 9                | 12.20823                | -2.61667 | -0.70433 |
| 91               | 16               | -9.27782                | -1.48312 | 2.389099 |
| 92               | 16               | -8.04912                | 3.144565 | -0.66769 |

**JK-PTZ-2**

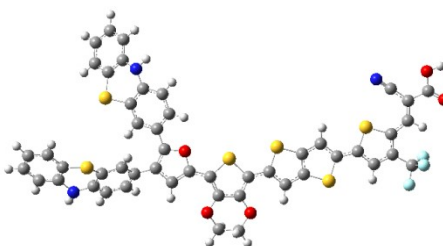

| center<br>Number | Atomic<br>Number | Coordinates (Angstroms) |          |          |
|------------------|------------------|-------------------------|----------|----------|
|                  |                  | X                       | Y        | Z        |
| 1                | 6                | -1.94712                | -1.75544 | -0.26789 |
| 2                | 6                | -3.12532                | -2.4593  | -0.35098 |
| 3                | 6                | -4.19147                | -1.51845 | -0.19666 |
| 4                | 1                | -3.21676                | -3.52845 | -0.46674 |
| 5                | 6                | -3.59455                | -0.27592 | -0.0464  |
| 6                | 6                | -0.56769                | -2.13027 | -0.32877 |
| 7                | 6                | -0.03674                | -3.39097 | -0.53414 |
| 8                | 6                | 1.382608                | -3.42056 | -0.5319  |
| 9                | 6                | 1.973212                | -2.17896 | -0.3412  |
| 10               | 6                | -0.0515                 | -5.61328 | -1.24714 |
| 11               | 6                | 1.281937                | -5.75777 | -0.53221 |
| 12               | 1                | -0.66952                | -6.50181 | -1.10192 |
| 13               | 1                | 1.862183                | -6.58388 | -0.94834 |
| 14               | 6                | 3.373548                | -1.86461 | -0.28895 |
| 15               | 6                | 4.444111                | -2.7188  | -0.53138 |
| 16               | 6                | 5.587214                | -0.7051  | -0.03328 |
| 17               | 6                | 5.68191                 | -2.05748 | -0.38373 |
| 18               | 1                | 4.311836                | -3.75622 | -0.80298 |
| 19               | 6                | 6.825525                | -0.05051 | 0.106065 |
| 20               | 6                | 7.895892                | -0.9016  | -0.13767 |
| 21               | 1                | 6.945535                | 0.993699 | 0.371055 |
| 22               | 16               | 7.347174                | -2.54025 | -0.54642 |
| 23               | 16               | 3.91753                 | -0.22685 | 0.130524 |
| 24               | 16               | 0.720176                | -0.95474 | -0.15375 |
| 25               | 8                | -0.80041                | -4.51348 | -0.70357 |
| 26               | 8                | 2.086412                | -4.57731 | -0.71375 |
| 27               | 1                | 0.105226                | -5.44998 | -2.32128 |
| 28               | 1                | 1.126631                | -5.92509 | 0.541023 |
| 29               | 8                | -2.22728                | -0.42751 | -0.08045 |
| 30               | 6                | 9.298273                | -0.59697 | -0.09161 |
| 31               | 6                | 10.36954                | -1.44765 | -0.34265 |
| 32               | 16               | 9.861089                | 1.009641 | 0.319161 |
| 33               | 6                | 11.62173                | -0.81447 | -0.20654 |
| 34               | 1                | 10.26156                | -2.48995 | -0.61566 |
| 35               | 6                | 11.54448                | 0.544037 | 0.153926 |
| 36               | 6                | 12.66982                | 1.391114 | 0.349486 |
| 37               | 6                | 12.73759                | 2.716471 | 0.697646 |
| 38               | 6                | 11.59091                | 3.526938 | 0.94021  |
| 39               | 6                | 14.08846                | 3.324902 | 0.824542 |
| 40               | 7                | 10.6411                 | 4.174241 | 1.134782 |
| 41               | 1                | 14.95139                | 4.947685 | 1.231517 |
| 42               | 8                | 15.13363                | 2.730412 | 0.641417 |
| 43               | 8                | 14.03469                | 4.630913 | 1.170767 |
| 44               | 1                | 13.63779                | 0.915531 | 0.199795 |
| 45               | 6                | -5.62471                | -1.87781 | -0.15758 |
| 46               | 6                | -6.18263                | -2.69973 | -1.14876 |
| 47               | 6                | -6.45671                | -1.45203 | 0.892672 |
| 48               | 6                | -7.5287                 | -3.06123 | -1.10728 |
| 49               | 1                | -5.56588                | -3.03648 | -1.97657 |
| 50               | 6                | -7.79345                | -1.84115 | 0.961021 |
| 51               | 1                | -6.04791                | -0.82714 | 1.680803 |
| 52               | 6                | -8.35036                | -2.64397 | -0.05253 |
| 53               | 1                | -7.94826                | -3.67534 | -1.90067 |
| 54               | 6                | -10.3876                | -1.36134 | 1.6462   |
| 55               | 6                | -10.6908                | -2.20522 | 0.56265  |
| 56               | 1                | -10.0077                | -3.58065 | -0.78177 |
| 57               | 6                | -11.3762                | -0.53455 | 2.184969 |
| 58               | 6                | -11.996                 | -2.22015 | 0.052997 |
| 59               | 6                | -12.6818                | -0.57162 | 1.687228 |
| 60               | 1                | -11.122                 | 0.129098 | 3.006132 |
| 61               | 1                | -12.2316                | -2.86613 | -0.78965 |
| 62               | 6                | -12.9892                | -1.42177 | 0.622931 |
| 63               | 1                | -13.446                 | 0.062213 | 2.125431 |
| 64               | 1                | -13.9979                | -1.45701 | 0.223072 |
| 65               | 6                | -4.07153                | 1.094585 | 0.094493 |
| 66               | 6                | -3.24639                | 2.083041 | 0.663178 |
| 67               | 6                | -5.34684                | 1.479124 | -0.36509 |
| 68               | 6                | -3.6817                 | 3.399848 | 0.768186 |
| 69               | 1                | -2.25546                | 1.818419 | 1.014182 |
| 70               | 6                | -5.80038                | 2.787042 | -0.21924 |
| 71               | 1                | -5.99497                | 0.750063 | -0.83755 |
| 72               | 6                | -4.96412                | 3.771783 | 0.340776 |
| 73               | 1                | -3.02301                | 4.151997 | 1.195753 |
| 74               | 6                | -7.28048                | 4.913408 | -1.08031 |
| 75               | 6                | -6.29953                | 5.687724 | -0.43484 |
| 76               | 1                | -4.72635                | 5.726278 | 0.866481 |
| 77               | 6                | -8.15155                | 5.512556 | -1.99341 |
| 78               | 6                | -6.22658                | 7.061125 | -0.70371 |
| 79               | 6                | -8.08825                | 6.886898 | -2.24015 |
| 80               | 1                | -8.891                  | 4.899343 | -2.50007 |
| 81               | 1                | -5.46416                | 7.660444 | -0.21146 |

| center<br>Number | Atomic<br>Number | Coordinates (Angstroms) |          |          |
|------------------|------------------|-------------------------|----------|----------|
|                  |                  | X                       | Y        | Z        |
| 82               | 6                | -7.12588                | 7.659966 | -1.5874  |
| 83               | 1                | -8.78223                | 7.343843 | -2.93827 |
| 84               | 1                | -7.06197                | 8.727783 | -1.77279 |
| 85               | 7                | -5.40998                | 5.092055 | 0.475646 |
| 86               | 7                | -9.69705                | -3.03047 | 0.007662 |
| 87               | 6                | 12.85789                | -1.49686 | -0.41752 |
| 88               | 7                | 13.85783                | -2.06659 | -0.59281 |
| 89               | 16               | -7.48482                | 3.191854 | -0.6519  |
| 90               | 16               | -8.76877                | -1.42637 | 2.397923 |

### JK-PTZ-3

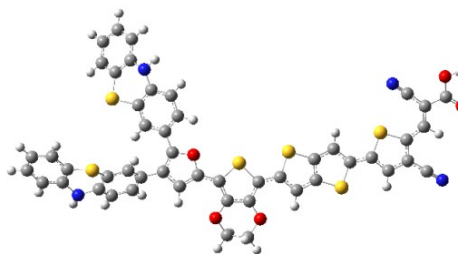

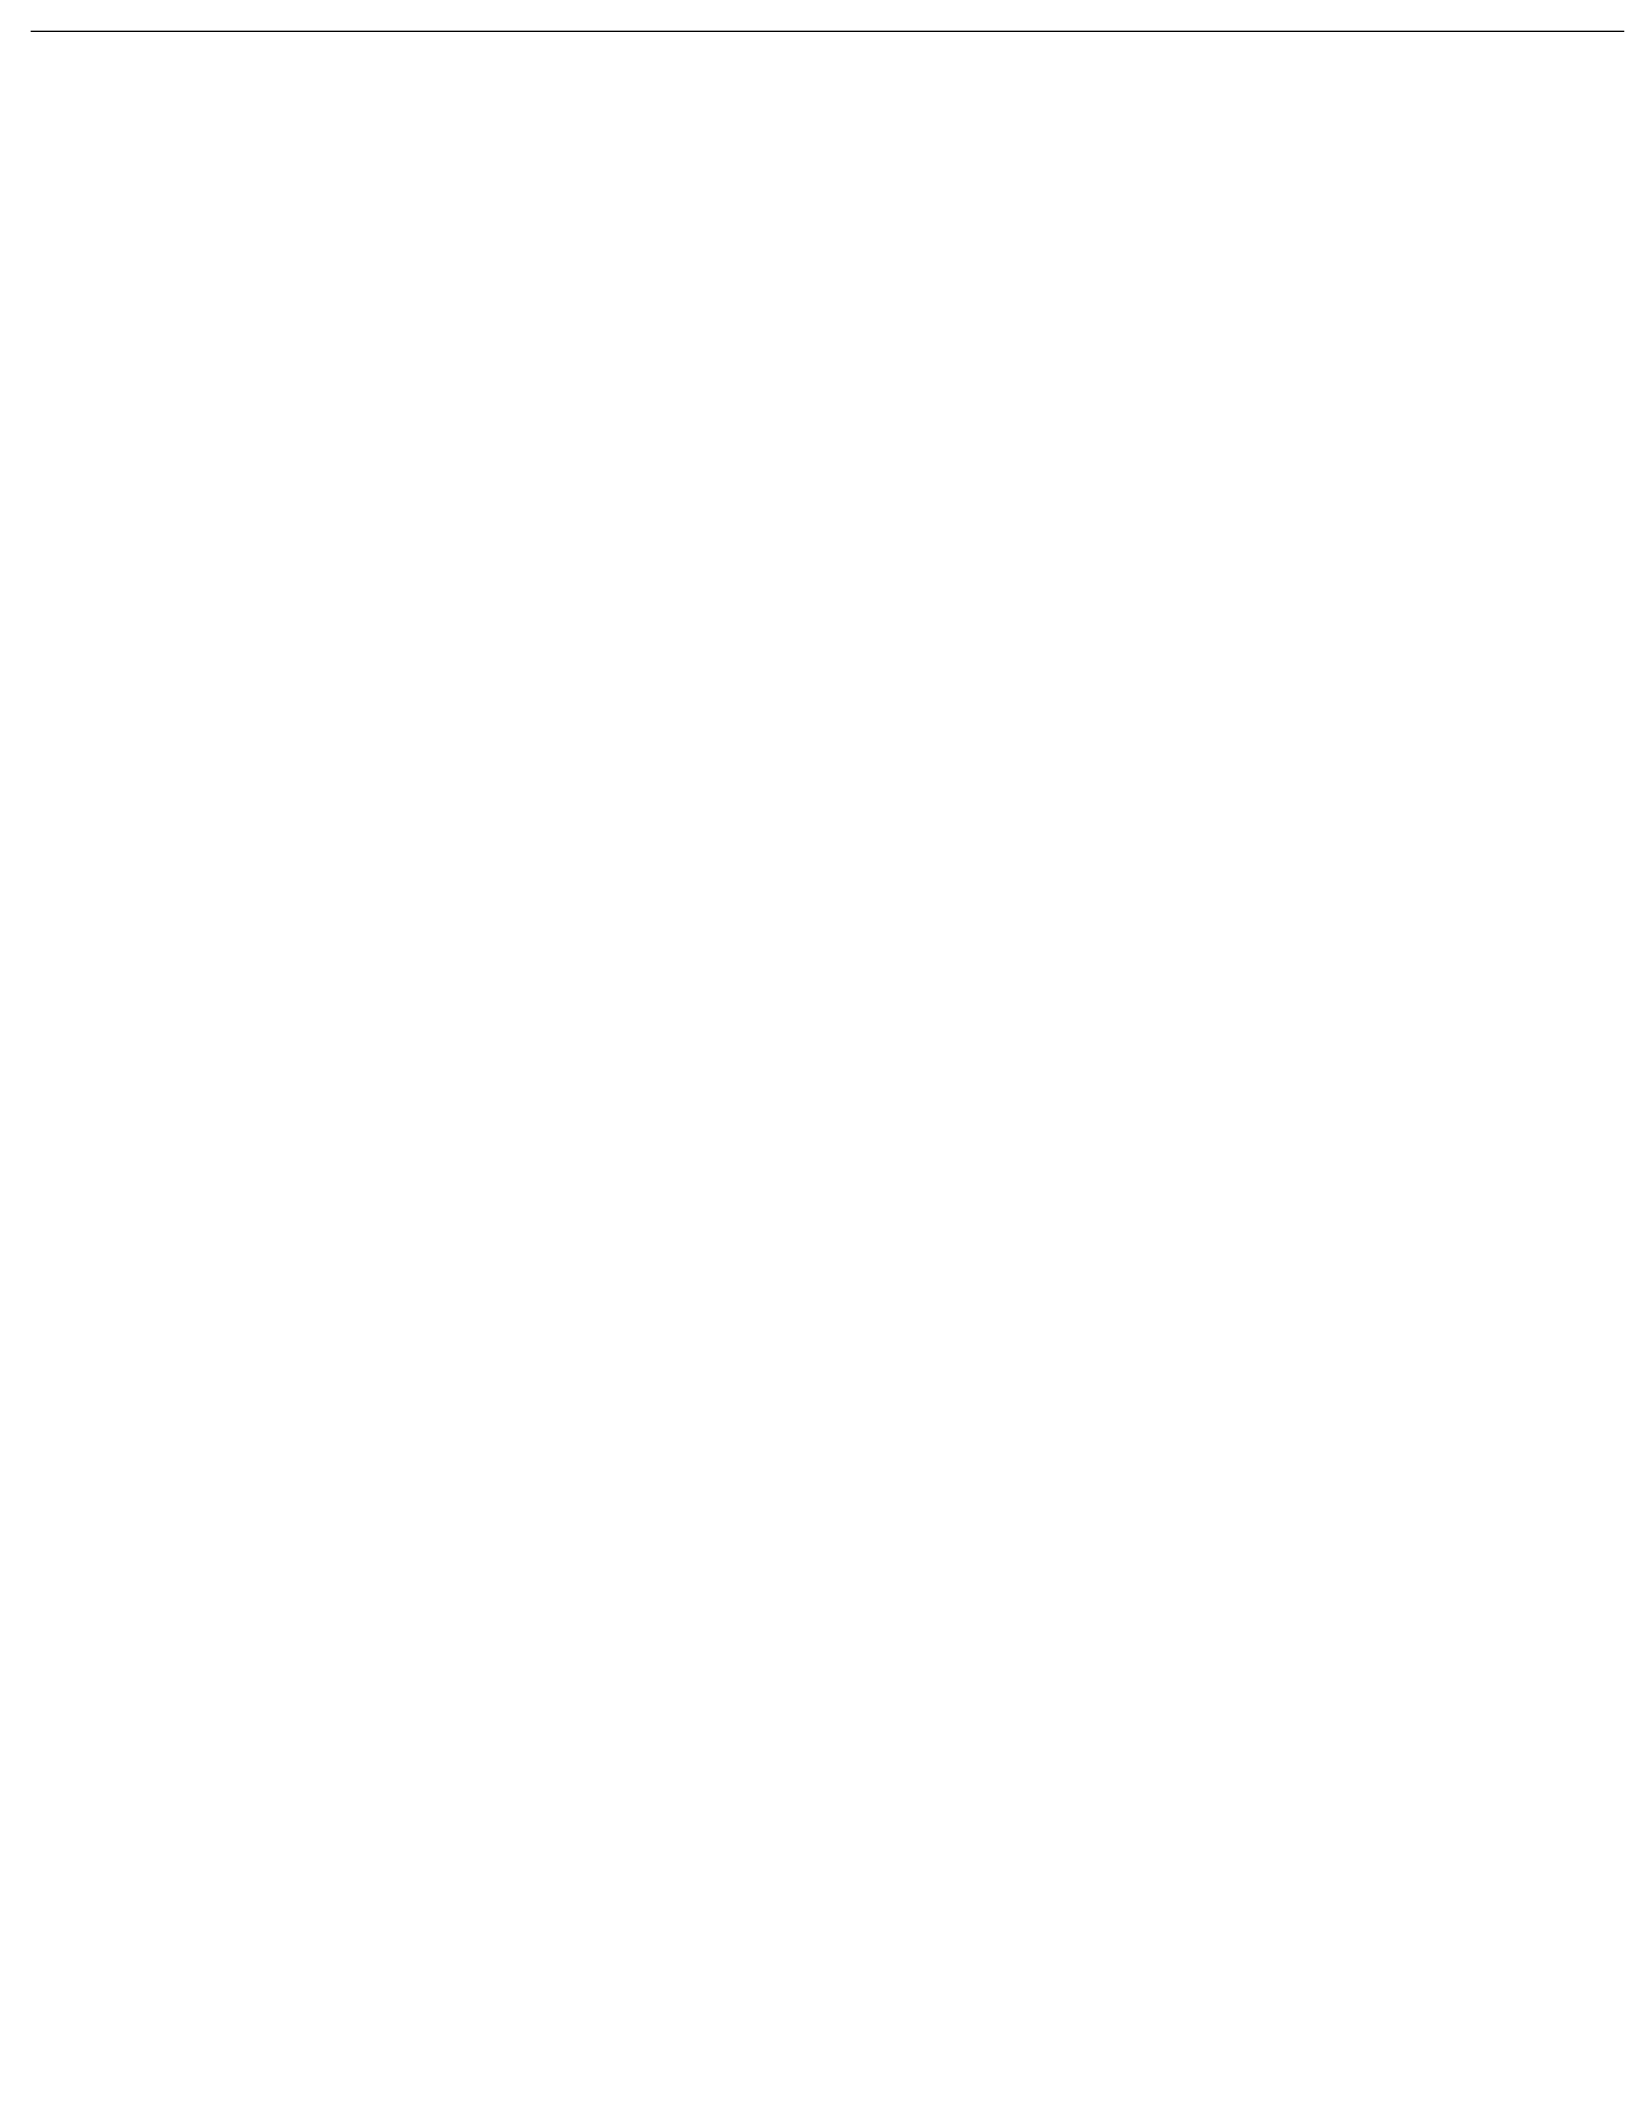

Supplement: d2ra00906d1.pdf [file d2ra00906d1.pdf]
